# Supplementary material for: Srebf2 Locus Overexpression Reduces Body Weight, Total Cholesterol and Glucose Levels in Mice Fed with Two Different Diets
Source: MDPI journal article supplement (doi:10.3390/nu12103130), 2020-10-14
Supplement: s1 [file s1]

**Supplementary Table 1. Diets composition**

| Standard Diet           |                         | HFHS Diet                |              |
|-------------------------|-------------------------|--------------------------|--------------|
| <i>Macronutrients</i>   |                         | <i>Proximate Profile</i> |              |
| Crude Protein           | 14.3 %                  | Protein                  | 20.5 %       |
| Fat (ether extract)     | 0.00                    | Fat                      | 36.0 %       |
| Carbohydrate available  | 0.48                    | Fiber                    | 0.0 %        |
| Crude Fiber             | 4.1 %                   | Ash                      | 3.5 %        |
| Neutral Detergent Fiber | 18.0 %                  | Moisture                 | <10 %        |
| Ash                     | 4.7 %                   | Carbohydrate             | 36.2 %       |
| Energy Density          | 2.9 (12.1) kcal/g(kJ/g) | <i>Caloric Profile</i>   |              |
| Calories from Protein   | 20 %                    | Protein                  | 0.82 Kcal/gm |
| Calories from Fat       | 13 %                    | Fat                      | 3.24 Kcal/gm |
| Calories Carbohydrate   | 67 %                    | Carbohydrate             | 1.45 Kcal/gm |
| <i>Minerals</i>         |                         | <i>Amino Acids</i>       |              |
| Calcium                 | 0.7 %                   | Alanine                  | 5.3 gm/kg    |
| Phosphorus              | 0.6 %                   | Arginine                 | 7.3 gm/kg    |
| Non-Phytate Phosphorus  | 0.3 %                   | Aspartic Acid            | 12.8 gm/kg   |
| Sodium                  | 0.1 %                   | Cystine                  | 0.6 gm/kg    |
| Potassium               | 0.6 %                   | Glutamic Acid            | 40.6 gm/kg   |
| Chloride                | 0.3 %                   | Glycine                  | 4.9 gm/kg    |
| Magnesium               | 0.2 %                   | Histidine                | 5.5 gm/kg    |
| Zinc                    | 70 mg/kg                | Isoleucine               | 11.0 gm/kg   |
| Manganese               | 100 mg/kg               | Leucine                  | 16.6 gm/kg   |
| Copper                  | 15 mg/kg                | Lysine                   | 14.8 gm/kg   |
| Iodine                  | 6 mg/kg                 | Methionine               | 7.1 gm/kg    |
| Iron                    | 175 mg/kg               | Phenylalanine            | 8.9 gm/kg    |
| Selenium                | 0.23 mg/kg              | Proline                  | 20.5 gm/kg   |
| <i>Vitamins</i>         |                         | Serine                   | 11.4 gm/kg   |
| Vitamin A               | 6.0 IU/g                | Threonine                | 8.7 gm/kg    |
| Vitamin D3              | 0.6 IU/g                | Tryptophan               | 2.2 gm/kg    |
| Vitamin E               | 120 IU/g                | Tyrosine                 | 11.4 gm/kg   |
| Vitamin K3 (menadione)  | 20 mg/kg                | Valine                   | 13.0 gm/kg   |
| Vitamin B1 (thiamin)    | 12 mg/kg                | <i>Carbohydrates</i>     |              |
| Vitamin B2 (riboflavin) | 6 mg/kg                 | Monosaccharides          | 1.0 gm/kg    |
| Niacin (nicotinic acid) | 54 mg/kg                | Disaccharides            | 243 gm/kg    |
| Vitamin B6 (pyridoxine) | 10 mg/kg                | Polysaccharides          | 113 gm/kg    |
| Pantothenic Acid        | 17 mg/kg                | <i>Fatty Acids</i>       |              |
| Vitamin B12             | 0.03 mg/kg              | C18:2 Linoleic           | 36.6 gm/kg   |
| Biotin                  | 0.26 mg/kg              | C18:3 Linolenic          | 3.6 gm/kg    |
| Folate                  | 2 mg/kg                 | Total Saturated          | 141 gm/kg    |
| Choline                 | 1030 mg/kg              | Total Monounsaturated    | 162 gm/kg    |
| <i>Amino Acids</i>      |                         | Total Polyunsaturated    | 40.2 gm/kg   |
| Aspartic Acid           | 0.9 %                   | <i>Minerals</i>          |              |
| Glutamic Acid           | 2.9 %                   | Calcium                  | 5.6 gm/kg    |
| Alanine                 | 0.9 %                   | Chloride                 | 0.86 gm/kg   |
| Glycine                 | 0.7 %                   | Copper                   | 3.6 gm/kg    |
| Threonine               | 0.5 %                   | Chromium                 | 0.41 gm/kg   |
| Proline                 | 1.2 %                   | Fluoride                 | 11.0 gm/kg   |
| Serine                  | 0.7 %                   | Iodine                   | 0.31 gm/kg   |
| Leucine                 | 1.4 %                   | Iron                     | 40.8 gm/kg   |
| Isoleucine              | 0.6 %                   | Magnesium                | 0.49 gm/kg   |
| Valine                  | 0.7 %                   | Manganese                | 46.7 gm/kg   |
| Phenylalanine           | 0.7 %                   | Phosphorus               | 5.8 gm/kg    |
| Tyrosine                | 0.4 %                   | Potassium                | 5.6 gm/kg    |
| Methionine              | 0.3 %                   | Selenium                 | 0.21 gm/kg   |
| Cystine                 | 0.3 %                   | Sodium                   | 571 gm/kg    |

|                                                                                             |         |                        |            |
|---------------------------------------------------------------------------------------------|---------|------------------------|------------|
| Lysine                                                                                      | 0.7 %   | Sulfur                 | 668 gm/kg  |
| Histidine                                                                                   | 0.4 %   | Zinc                   | 21.6 gm/kg |
| Arginine                                                                                    | 0.8 %   | <i>Vitamins</i>        |            |
| Tryptophan                                                                                  | 0.2 %   | Choline                | 1148 gm/kg |
| <i>Fatty Acids</i>                                                                          |         | Folic Acid             | 0.75 gm/kg |
| C16:0 Palmitic                                                                              | 0.5 %   | Niacin                 | 15.0 gm/kg |
| C18:0 Stearic                                                                               | 0.1 %   | Pantothenic Acid       | 5.5 gm/kg  |
| C18:1 $\omega$ 9 Oleic                                                                      | 0.7 %   | Pyridoxine             | 4.1 gm/kg  |
| C18:2 $\omega$ 6 Linoleic                                                                   | 2.0 %   | Riboflavin             | 2.3 gm/kg  |
| C18:3 $\omega$ 3 Linolenic                                                                  | 0.1 %   | Thiamin                | 3.0 gm/kg  |
| Total Saturated                                                                             | 0.6 %   | Vitamin A              | 3162 IU/kg |
| Total Monounsaturated                                                                       | 0.7 %   | Vitamin B12            | 40 mcg/kg  |
| Total Polyunsaturated                                                                       | 2.1 %   | Vitamin D2             | 1000 IU/kg |
| <i>Other</i>                                                                                |         | Vitamin E              | 25.7 IU/kg |
| Cholesterol                                                                                 | 0 mg/kg | Vitamin K3 (Menadione) | 0.52 gm/kg |
| <i>Ingredients</i>                                                                          |         |                        |            |
| Lard, Sucrose, Casein, Maltodextrin,<br>Mineral Mix, Vitamin Mix,<br>DL-Methionine, Choline |         |                        |            |

*Composition of standard and HFHS diets, given by commercial companies*
